# Supplementary material for: Enhanced Luminance of CdSe/ZnS Quantum Dots Light-Emitting Diodes Using ZnO-Oleic Acid/ZnO Quantum Dots Double Electron Transport Layer
Source: MDPI journal article supplement (doi:10.3390/nano12122038), 2022-06-14
Supplement: s1 [file s1]

# Enhanced Luminance of CdSe/ZnS Quantum Dots Light-Emitting Diodes Using ZnO-Oleic Acid/ZnO Quantum Dots Double Electron Transport Layer

Da Young Lee <sup>1,2,†</sup>, Hong Hee Kim <sup>1,†</sup>, Ji-Hyun Noh <sup>1</sup>, Keun-Yong Lim <sup>1</sup>, Donghee Park <sup>1,\*</sup>, In-Hwan Lee <sup>2</sup>, and Won Kook Choi <sup>1,3,\*</sup>

<sup>1</sup> Center for Optoelectronic Materials and Devices, Korea Institute of Science and Technology, Seoul 02792, Korea; dayoung5178@naver.com (D.Y.L.); hongheekim85@kist.re.kr (H.H.K.);

luzhexian@hanyang.ac.kr (J.-H.N.); t14822@kist.re.kr (K.-Y.L.)

<sup>2</sup> Department of Materials Science and Engineering, Korea University, Seoul 02841, Korea; ihlee@korea.ac.kr

<sup>3</sup> Department of Nanoscience and Engineering, KIST School, University of Science and Technology, Daejeon 34113, Korea

\* Correspondence: pdmtime@kist.re.kr (D.P.); wkchoi@kist.re.kr (W.K.C.)

† These authors contributed equally to this work.

**Figure S1. Deconvoluted Gaussian sub-peaks of O1s XPS spectra of (a) ZnO, (b) ZnO-OA (0.5 ml) and (c) ZnO-OA (1.0 ml), respectively.**

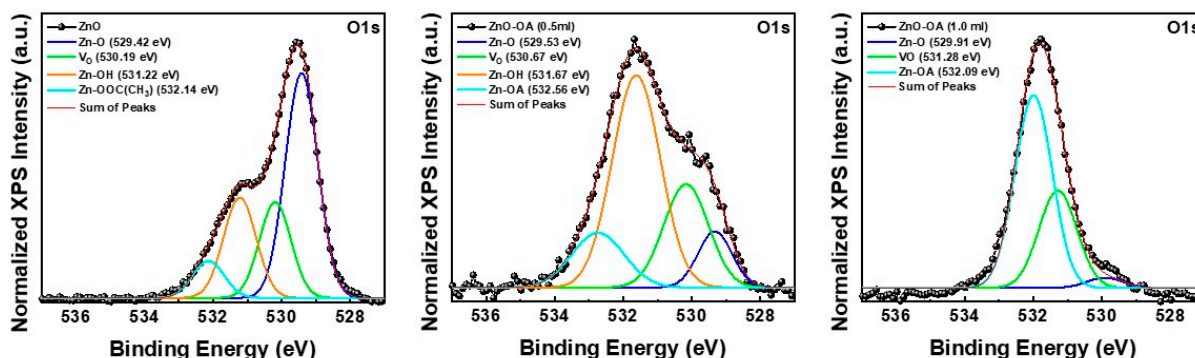

**Calculated values: deconvoluted Gaussian sub-peaks of O1s XPS spectra of (a) ZnO, (b) ZnO-OA (0.5 ml) and (c) ZnO-OA (1.0 ml), respectively.**

| Model           | Gauss                                                |                     |                     |                     |
|-----------------|------------------------------------------------------|---------------------|---------------------|---------------------|
| Equation        | $y=y_0 + (A/(w*\sqrt{\pi/2}))*\exp(-2*((x-xc)/w)^2)$ |                     |                     |                     |
| Plot            | Peak1(B)                                             | Peak2(B)            | Peak3(B)            | Peak4(B)            |
| y0              | 0.01725 ± 0.00115                                    | 0.01725 ± 0.00115   | 0.01725 ± 0.00115   | 0.01725 ± 0.00115   |
| xc              | 529.42337 ± 0.16294                                  | 530.19252 ± 0.21216 | 531.22432 ± 0.13661 | 532.14024 ± 0.48295 |
| w               | 0.9553 ± 0.08965                                     | 0.92296 ± 0.63664   | 0.95249 ± 0.54001   | 0.92095 ± 0.31084   |
| A               | 1.02263 ± 0.47114                                    | 0.42045 ± 0.726     | 0.45425 ± 0.48341   | 0.16199 ± 0.21894   |
| Reduced Chi-Sqr | 1.26673E-4                                           |                     |                     |                     |
| R-Square (COD)  | 0.99821                                              |                     |                     |                     |
| Adj. R-Square   | 0.99806                                              |                     |                     |                     |

| Model           | Gauss                                                |                     |                     |                     |
|-----------------|------------------------------------------------------|---------------------|---------------------|---------------------|
| Equation        | $y=y_0 + (A/(w*\sqrt{\pi/2}))*\exp(-2*((x-xc)/w)^2)$ |                     |                     |                     |
| Plot            | Peak1(B)                                             | Peak2(B)            | Peak3(B)            | Peak4(B)            |
| y0              | 0.05353 ± 0.0026                                     | 0.05353 ± 0.0026    | 0.05353 ± 0.0026    | 0.05353 ± 0.0026    |
| xc              | 529.32705 ± 1.21473                                  | 530.16701 ± 1.50183 | 531.62031 ± 0.38263 | 532.73915 ± 3.21811 |
| w               | 0.99468 ± 1.27872                                    | 1.30824 ± 4.65014   | 1.4041 ± 1.45411    | 1.53027 ± 1.62373   |
| A               | 0.26665 ± 2.92124                                    | 0.5455 ± 4.68947    | 1.42428 ± 4.00524   | 0.40037 ± 2.30771   |
| Reduced Chi-Sqr | 5.14493E-4                                           |                     |                     |                     |
| R-Square (COD)  | 0.99411                                              |                     |                     |                     |
| Adj. R-Square   | 0.9936                                               |                     |                     |                     |

| Model           | Gauss                                                |                     |                     |
|-----------------|------------------------------------------------------|---------------------|---------------------|
| Equation        | $y=y_0 + (A/(w*\sqrt{\pi/2}))*\exp(-2*((x-xc)/w)^2)$ |                     |                     |
| Plot            | Peak1(B)                                             | Peak2(B)            | Peak3(B)            |
| y0              | 0.05176 ± 0.00256                                    | 0.05176 ± 0.00256   | 0.05176 ± 0.00256   |
| xc              | 529.91163 ± 1.4121                                   | 531.28659 ± 2.02117 | 532.09478 ± 0.88995 |
| w               | 1.05431 ± 1.33975                                    | 1.10886 ± 1.52123   | 1.09282 ± 0.37244   |
| A               | 0.04164 ± 0.14927                                    | 0.28578 ± 3.02394   | 1.04653 ± 2.90128+E |
| Reduced Chi-Sqr | 6.48152E-4                                           |                     |                     |
| R-Square (COD)  | 0.98989                                              |                     |                     |
| Adj. R-Square   | 0.98925                                              |                     |                     |

**Table S1. ZnO nanoparticles hybridized with various inorganic and organic materials for electron transport layer or emissive materials.**

|   | Materials                                     | Approaches                               | Results                                                   | References                                       |
|---|-----------------------------------------------|------------------------------------------|-----------------------------------------------------------|--------------------------------------------------|
| 1 | ZnO/OA                                        | Passivation of surface defects           | Strong blue emission                                      | J. Am. Chem. Soc. <b>2007</b> , 129, 16029–16033 |
| 2 | ZnO@TiO <sub>2</sub>                          | Blue emitter                             | White emission                                            | Sci. Rep. <b>2015</b> , 4, 4085–4090             |
| 3 | Zn <sub>1-x</sub> Mg <sub>x</sub> O (x=0~0.1) | ETL for QLEDs                            | Increased luminescence of CIS/ZnS QLEDs                   | Chem. Mater. <b>2015</b> , 27, 197–204           |
| 4 | ZnO/PEIE                                      | ETL for inverted QLEDs                   | Enhanced electron injection by lowering work function     | Sci. Rep. <b>2015</b> , 5, 1–5                   |
| 5 | ZnO/OA                                        | ETL for MAObBr <sub>3</sub> -PVP PeLEDs* | Enhanced luminescence and current efficiency              | J. Alloys Comp. 2019, 786, 11–17                 |
| 6 | ZnO@SnO <sub>2</sub>                          | ETL for                                  | Improved Efficiency of Perovskite Solar Cell              | J. Am. Chem. Soc. <b>2019</b> , 141, 17610–17616 |
| 7 | ZnO(Ga, Mg)                                   | ETL for QLEDs                            | Optimization of e/h injection                             | RSC Adv. <b>2019</b> , 9, 32066–32071            |
| 8 | ZnO/C <sub>60</sub>                           | ETL for CsPbI <sub>3</sub> PeLEDs*       | Enhanced luminescence by suppression of exciton quenching | J. Phys. Chem. C <b>2020</b> , 124, 28277–28284  |
| 9 | ZnO-OA/ZnO                                    | Double ETL for QLEDs                     | Enhanced luminescence by hole blocking                    | This study                                       |

\*PeLEDs : perovskite LEDs

**Table S2. XPS O1s spectra evaluated from ZnO, ZnO-OA (0.5ml) and ZnO-OA (1.0ml), respectively.**

|                                 | <b>Peak 1</b><br><b>(Zn-O)</b> | <b>Peak 2</b><br><b>(VO)</b> | <b>Peak 3</b><br><b>(Zn-OH)</b> | <b>Peak 4</b><br><b>(Zn-OOC) or</b><br><b>(Zn-OA)</b> |            |
|---------------------------------|--------------------------------|------------------------------|---------------------------------|-------------------------------------------------------|------------|
| <b>ZnO</b>                      | <b>49.7</b>                    | <b>20.5</b>                  | <b>22.0</b>                     | <b>7.8</b>                                            | <b>100</b> |
| <b>ZnO-OA</b><br><b>(0.5ml)</b> | <b>9.9</b>                     | <b>20.6</b>                  | <b>54.2</b>                     | <b>15.3</b>                                           | <b>100</b> |
| <b>ZnO-OA</b><br><b>(1.0ml)</b> | <b>2.9</b>                     | <b>20.6</b>                  |                                 | <b>76.5</b>                                           | <b>100</b> |
